# Supplementary material for: Efficacy and safety of sarilumab monotherapy versus adalimumab monotherapy for the treatment of patients with active rheumatoid arthritis (MONARCH): a randomised, double-blind, parallel-group phase III trial
Source: PubMed Central journal article supplement — Ann Rheum Dis. 2016 Nov 17;76(5):840–7. doi: 10.1136/annrheumdis-2016-210310 (PMC5530335; doi:10.1136/annrheumdis-2016-210310), 2016-11-17
Supplement: annrheumdis-2016-210310supp001.pdf [file annrheumdis-2016-210310supp001.pdf]

**Supplementary Table 1.** List of Efficacy Endpoints in MONARCH

|                             |                                                                           |
|-----------------------------|---------------------------------------------------------------------------|
| <b>Primary endpoint</b>     | Change from baseline in DAS28-ESR at week 24                              |
| <b>Secondary endpoints*</b> | DAS28-ESR remission (<2.6) at week 24                                     |
|                             | ACR20, ACR50, and ACR70 response at week 24                               |
|                             | Change from baseline in HAQ-DI at week 24                                 |
|                             | Change from baseline in SF-36 (physical and mental components) at week 24 |
|                             | Change from baseline in FACIT-F at week 24                                |
|                             | -----                                                                     |
|                             | DAS28-ESR low disease activity (<3.2) at week 24                          |
|                             | Change from baseline in each individual ACR component at week 24          |
|                             | Change from baseline in DAS28-CRP at weeks 12 and 24                      |
|                             | DAS28-CRP remission (<2.6) at week 24                                     |
|                             | DAS28-CRP low disease activity (<3.2) at week 24                          |
|                             | Change from baseline in CDAI at weeks 12 and 24                           |
|                             | CDAI remission ( $\leq$ 2.8) at weeks 12 and 24                           |

\*Items above the dotted line were part of the hierarchy; items below the dotted line were prespecified secondary endpoints. All primary and secondary endpoints were also analyzed at week 12. ACR, American College of Rheumatology; CDAI, Clinical Disease Activity Index; CRP, C-reactive protein; DAS28-CRP, 28-joint disease activity score using CRP; DAS28-ESR, DAS28 using erythrocyte sedimentation rate; FACIT-F, Functional Assessment of Chronic Illness Therapy–Fatigue; HAQ-DI, Health Assessment Questionnaire–Disability Index; SF-36, Short Form 36 Health Survey.
