# Supplementary material for: Efficacy and safety of sarilumab monotherapy versus adalimumab monotherapy for the treatment of patients with active rheumatoid arthritis (MONARCH): a randomised, double-blind, parallel-group phase III trial
Source: PubMed Central journal article supplement — Ann Rheum Dis. 2016 Nov 17;76(5):840–7. doi: 10.1136/annrheumdis-2016-210310 (PMC5530335; doi:10.1136/annrheumdis-2016-210310), 2016-11-17
Supplement: annrheumdis-2016-210310supp003.pdf [file annrheumdis-2016-210310supp003.pdf]

**Supplementary Table 2.** Sensitivity Analyses for Change for MONARCH Primary Endpoint

|                                   | <b>Adalimumab 40<br/>mg q2w (n=185)</b> | <b>Sarilumab 200<br/>mg q2w (n=184)</b> | <b>P value</b> |
|-----------------------------------|-----------------------------------------|-----------------------------------------|----------------|
| <b>Sensitivity analysis 1*</b>    |                                         |                                         |                |
| DAS28-ESR, week 24                |                                         |                                         |                |
| Mean (SD)                         | 4.5 (1.4)                               | 3.5 (1.5)                               |                |
| LS mean change from baseline (SE) | -2.2 (0.1)                              | -3.2 (0.1)                              | <0.0001        |
| <b>Sensitivity analysis 2†</b>    |                                         |                                         |                |
| DAS28-ESR, week 24                |                                         |                                         |                |
| Mean (SD)                         | 4.4 (1.3)                               | 3.3 (1.3)                               |                |
| LS mean change from baseline (SE) | -2.3 (0.1)                              | -3.3 (0.1)                              | <0.0001        |

\*Included all data, including assessments made after permanent treatment discontinuation. All patients were requested to return for week 24 assessments even if they previously discontinued treatment.

†All data after treatment discontinuation or adalimumab (or matching placebo) dose increase were set to missing, and a multiple imputation approach (assuming missing at random) was used.

DAS28-ESR, 28-joint disease activity score using erythrocyte sedimentation rate; LS, least squares; q2w, every 2 weeks; SD, standard deviation; SE, standard error.
