# Supplementary material for: Efficacy and safety of sarilumab monotherapy versus adalimumab monotherapy for the treatment of patients with active rheumatoid arthritis (MONARCH): a randomised, double-blind, parallel-group phase III trial
Source: PubMed Central journal article supplement — Ann Rheum Dis. 2016 Nov 17;76(5):840–7. doi: 10.1136/annrheumdis-2016-210310 (PMC5530335; doi:10.1136/annrheumdis-2016-210310), 2016-11-17
Supplement: annrheumdis-2016-210310supp004.pdf [file annrheumdis-2016-210310supp004.pdf]

**Supplementary Table 3.** Subgroup Analysis of Change from Baseline in DAS28-ESR at Week 24

|                                          | Adalimumab 40 mg q2w<br>(n=185) | Sarilumab 200 mg q2w<br>(n=184) |
|------------------------------------------|---------------------------------|---------------------------------|
| MTX history                              |                                 |                                 |
| Inadequate responders, n                 | 92                              | 89                              |
| Mean (SD)                                | 4.4 (1.4)                       | 3.6 (1.5)                       |
| LS mean change from baseline (SE)        | -2.3 (0.2)                      | -3.2 (0.2)                      |
| Mean difference, 95% CI vs adalimumab    | —                               | -0.891 (-1.293, -0.489)         |
| Intolerant/Inappropriate to continue, n* |                                 |                                 |
| Mean (SD)                                | 4.7 (1.3)                       | 3.2 (1.4)                       |
| LS mean change from baseline (SE)        | -2.1 (0.2)                      | -3.4 (0.2)                      |
| Mean difference, 95% CI vs adalimumab    | —                               | -1.253 (-1.660, -0.846)         |
| Treatment-by-subgroup interaction        | —                               | <i>P</i> =0.2163                |
| Baseline corticosteroid use              |                                 |                                 |
| Yes, n                                   | 92                              | 83                              |
| Mean (SD)                                | 4.3 (1.1)                       | 3.7 (1.5)                       |
| LS mean change from baseline (SE)        | -2.3 (0.1)                      | -3.1 (0.1)                      |
| Mean difference, 95% CI vs adalimumab    | —                               | -0.806 (-1.168, -0.444)         |
| No, n                                    | 71                              | 82                              |
| Mean (SD)                                | 4.7 (1.6)                       | 3.3 (1.4)                       |
| LS mean change from baseline (SE)        | -2.0 (0.2)                      | -3.4 (0.2)                      |
| Mean difference, 95% CI vs adalimumab    | —                               | -1.402 (-1.856, -0.948)         |
| Treatment-by-subgroup interaction        | —                               | <i>P</i> =0.0414                |
| RA duration                              |                                 |                                 |
| ≤3 years, n                              | 73                              | 53                              |
| Mean (SD)                                | 4.5 (1.5)                       | 3.4 (1.5)                       |
| LS mean change from baseline (SE)        | -2.3 (0.2)                      | -3.3 (0.2)                      |
| Mean difference, 95% CI vs adalimumab    | —                               | -1.087 (-1.580, -0.594)         |
| >3 years, n                              | 90                              | 112                             |
| Mean (SD)                                | 4.5 (1.3)                       | 3.5 (1.4)                       |

|                                       |            |                         |
|---------------------------------------|------------|-------------------------|
| LS mean change from baseline (SE)     | -2.3 (0.1) | -3.3 (0.1)              |
| Mean difference, 95% CI vs adalimumab | —          | -1.037 (-1.392, -0.681) |
| Treatment-by-subgroup interaction     | —          | <i>P</i> =0.8465        |
| Region†                               |            |                         |
| Region 1, n                           | 52         | 52                      |
| Mean (SD)                             | 4.3 (1.4)  | 3.1 (1.3)               |
| LS mean change from baseline (SE)     | -2.3 (0.2) | -3.5 (0.2)              |
| Mean difference, 95% CI vs adalimumab | —          | -1.172 (-1.689, -0.656) |
| Region 2, n                           | 32         | 32                      |
| Mean (SD)                             | 4.7 (1.1)  | 3.9 (1.4)               |
| LS mean change from baseline (SE)     | -2.3 (0.2) | -3.1 (0.2)              |
| Mean difference, 95% CI vs adalimumab | —          | -0.809 (-1.394, -0.224) |
| Region 3, n                           | 79         | 81                      |
| Mean (SD)                             | 4.6 (1.4)  | 3.6 (1.5)               |
| LS mean change from baseline (SE)     | -2.1 (0.2) | -3.3 (0.2)              |
| Mean difference, 95% CI vs adalimumab | —          | -1.154 (-1.576, -0.731) |
| Treatment-by-subgroup interaction     | —          | <i>P</i> =0.6213        |

\*One patient was deemed inappropriate to continue MTX treatment.

†Region 1: Czech Republic, Germany, Hungary, Israel, Spain, and United States. Region 2: Chile and Peru. Region 3: South Korea, Poland, South Africa, Romania, Russia, and Ukraine.

CI, confidence interval; DAS28-ESR, 28-joint disease activity score using erythrocyte sedimentation rate; LS, least squares; MTX, methotrexate; q2w, every 2 weeks; RA, rheumatoid arthritis; SD, standard deviation; SE, standard error.
