# Supplementary material for: Efficacy and safety of sarilumab monotherapy versus adalimumab monotherapy for the treatment of patients with active rheumatoid arthritis (MONARCH): a randomised, double-blind, parallel-group phase III trial
Source: PubMed Central journal article supplement — Ann Rheum Dis. 2016 Nov 17;76(5):840–7. doi: 10.1136/annrheumdis-2016-210310 (PMC5530335; doi:10.1136/annrheumdis-2016-210310), 2016-11-17
Supplement: annrheumdis-2016-210310supp005.pdf [file annrheumdis-2016-210310supp005.pdf]

**Supplementary Table 4.** Additional Secondary Endpoints in MONARCH

|                                            | <b>Adalimumab<br/>40 mg q2w<br/>(n=185)</b> | <b>Sarilumab<br/>200 mg q2w<br/>(n=184)</b> | <b>P value*</b> |
|--------------------------------------------|---------------------------------------------|---------------------------------------------|-----------------|
| <b>CDAI, week 12</b>                       |                                             |                                             |                 |
| Mean (SD)                                  | 21.1 (14.7)                                 | 18.1 (13.1)                                 | 0.0465          |
| LS mean change from baseline (SE)          | -21.6 (1.0)                                 | -24.9 (1.0)                                 | 0.0072          |
| <b>CDAI, week 24</b>                       |                                             |                                             |                 |
| Mean (SD)                                  | 16.6 (10.4)                                 | 13.8 (11.4)                                 | 0.0244          |
| LS mean change from baseline (SE)          | -25.2 (0.8)                                 | -28.9 (0.8)                                 | 0.0013          |
| CDAI ≤2.8 (remission), n (%)               | 5 (2.7)                                     | 13 (7.1)                                    | 0.0468          |
| CDAI ≤10 (LDA), n (%) <sup>†</sup>         | 46 (24.9)                                   | 77 (41.8)                                   | 0.0005          |
| <b>DAS 28-CRP, week 12</b>                 |                                             |                                             |                 |
| Mean (SD)                                  | 4.26 (1.47)                                 | 3.51 (1.33)                                 | <0.0001         |
| LS mean change from baseline (SE)          | -1.72 (0.099)                               | -2.48 (0.098)                               | <0.0001         |
| <b>DAS28-CRP, week 24</b>                  |                                             |                                             |                 |
| Mean (SD)                                  | 3.92 (1.24)                                 | 3.07 (1.21)                                 | <0.0001         |
| LS mean change from baseline (SE)          | -1.97 (0.09)                                | -2.86 (0.09)                                | <0.0001         |
| DAS28-CRP <2.6 (remission), n (%)          | 25 (13.5)                                   | 63 (34.2)                                   | <0.0001         |
| DAS28-CRP ≤3.2 (LDA), n (%)                | 45 (24.3)                                   | 95 (51.6)                                   | <0.0001         |
| <b>ACR components, week 24<sup>‡</sup></b> |                                             |                                             |                 |
| Tender joint count (0-68)                  |                                             |                                             |                 |
| Mean (SD)                                  | 9.9 (10.6)                                  | 9.0 (10.5)                                  |                 |
| LS mean change from baseline (SE)          | -16.5 (0.8)                                 | -18.2 (0.8)                                 | 0.0986          |
| Swollen joint count (0-66)                 |                                             |                                             |                 |
| Mean (SD)                                  | 4.8 (5.6)                                   | 4.2 (6.3)                                   |                 |
| LS mean change from baseline (SE)          | -12.2 (0.5)                                 | -13.4 (0.4)                                 | 0.0446          |
| Pain VAS (0-100 mm)                        |                                             |                                             |                 |
| Mean (SD)                                  | 42.5 (23.7)                                 | 34.6 (22.5)                                 |                 |
| LS mean change from baseline (SE)          | -27.4 (1.8)                                 | -36.2 (1.8)                                 | 0.0005          |
| Physician global VAS (0-100 mm)            |                                             |                                             |                 |
| Mean (SD)                                  | 28.0 (18.1)                                 | 20.8 (17.1)                                 |                 |
| LS mean change from baseline (SE)          | -37.8 (1.4)                                 | -45.3 (1.4)                                 | 0.0001          |
| Patient global VAS (0-100 mm)              |                                             |                                             |                 |
| Mean (SD)                                  | 42.5 (22.1)                                 | 34.7 (21.6)                                 |                 |
| LS mean change from baseline (SE)          | -24.8 (1.8)                                 | -33.3 (1.7)                                 | 0.0005          |
| HAQ-DI (0-3)                               |                                             |                                             |                 |
| Mean (SD)                                  | 1.2 (0.7)                                   | 1.0 (0.7)                                   |                 |
| LS mean change from baseline (SE)          | -0.43 (0.05)                                | -0.61 (0.05)                                | 0.0037          |
| CRP (mg/L)                                 |                                             |                                             |                 |
| Mean (SD)                                  | 16.7 (25.5)                                 | 2.0 (6.6)                                   |                 |
| LS mean change from baseline (SE)          | -2.91 (1.5)                                 | -17.0 (1.4)                                 | <0.0001         |

|                                   |             |             |         |
|-----------------------------------|-------------|-------------|---------|
| ESR (mm/h)                        |             |             |         |
| Mean (SD)                         | 33.1 (24.8) | 13.5 (11.3) |         |
| LS mean change from baseline (SE) | -12.7 (1.4) | -32.1 (1.4) | <0.0001 |

---

\*Nominal *P* values.

†Post hoc analysis.

‡Lower mean scores indicate less severe disease.

ACR, American College of Rheumatology; CDAI, Clinical Disease Activity Index; CRP, C-reactive protein; DAS28-CRP, 28-joint disease activity score using CRP; DAS28-ESR, DAS28 using erythrocyte sedimentation rate; HAQ-DI, Health Assessment Questionnaire–Disability Index; LDA, low disease activity; LS, least squares; q2w, every 2 weeks; SD, standard deviation; SE, standard error. VAS, visual analog scale.
