# Supplementary material for: Efficacy and safety of sarilumab monotherapy versus adalimumab monotherapy for the treatment of patients with active rheumatoid arthritis (MONARCH): a randomised, double-blind, parallel-group phase III trial
Source: PubMed Central journal article supplement — Ann Rheum Dis. 2016 Nov 17;76(5):840–7. doi: 10.1136/annrheumdis-2016-210310 (PMC5530335; doi:10.1136/annrheumdis-2016-210310), 2016-11-17
Supplement: annrheumdis-2016-210310supp006.pdf [file annrheumdis-2016-210310supp006.pdf]

**Supplementary Table 5.** Change in Laboratory Values During Double-blind Treatment Period (Safety Population)

| n (%)                           | Adalimumab 40 mg q2w<br>(n=184) | Sarilumab 200 mg q2w<br>(n=184) |
|---------------------------------|---------------------------------|---------------------------------|
| ALT*                            |                                 |                                 |
| >1 to 1.5 × ULN                 | 22 (12.0)                       | 36 (19.6)                       |
| >1.5 to 3 × ULN                 | 17 (9.3)                        | 26 (14.1)                       |
| >3 to 5 × ULN                   | 3 (1.6)                         | 5 (2.7)                         |
| >5 to 10 × ULN                  | 1 (0.5)                         | 1 (0.5)                         |
| >10 to 20 × ULN                 | 1 (0.5)                         | 0                               |
| >20 × ULN                       | 0                               | 0                               |
| ALT and TBILI*                  |                                 |                                 |
| ALT >3 × ULN and TBILI >2 × ULN | 0                               | 0                               |
| Absolute neutrophil count*      |                                 |                                 |
| Grade 1: ≥1.5 Giga/L to LLN     | 21 (11.5)                       | 44 (23.9)                       |
| Grade 2: ≥1 to 1.5 Giga/L       | 5 (2.7)                         | 31 (16.8)                       |
| Grade 3: ≥0.5 to 1 Giga/L       | 2 (1.1)                         | 16 (8.7)                        |
| Grade 4: <0.5 Giga/L            | 0                               | 3 (1.6)                         |
| Platelet count <100 Giga/L*     |                                 |                                 |
| <100 Giga/L                     | 0                               | 1 (0.5)                         |
| ≥75 to 100 Giga/L               | 0                               | 0                               |
| ≥50 to 75 Giga/L                | 0                               | 0                               |
| ≥25 to 50 Giga/L                | 0                               | 0                               |
| <25 Giga/L                      | 0                               | 1 (0.5)                         |

\*N=183 for adalimumab, as 1 patient did not have the parameter assessed postbaseline.

ALT, alanine aminotransferase; LLN, lower limit of normal; q2w, every 2 weeks; TBILI, total bilirubin; ULN, upper limit of normal.
