# Supplementary material for: Efficacy and safety of sarilumab monotherapy versus adalimumab monotherapy for the treatment of patients with active rheumatoid arthritis (MONARCH): a randomised, double-blind, parallel-group phase III trial
Source: PubMed Central journal article supplement — Ann Rheum Dis. 2016 Nov 17;76(5):840–7. doi: 10.1136/annrheumdis-2016-210310 (PMC5530335; doi:10.1136/annrheumdis-2016-210310), 2016-11-17
Supplement: annrheumdis-2016-210310supp007.pdf [file annrheumdis-2016-210310supp007.pdf]

**Supplementary Table 6.** Low-Density Lipoprotein: Number of Patients With Different Average Postbaseline Status During AE Period (Safety Population)

| <b>LDL baseline*</b><br><b>Postbaseline n/N1, (%)</b> | <b>Adalimumab 40 mg<br/>q2w<br/>(n=184)</b> | <b>Sarilumab 200 mg q2w<br/>(n=184)</b> |
|-------------------------------------------------------|---------------------------------------------|-----------------------------------------|
| <100 mg/dL                                            |                                             |                                         |
| <100 mg/dL                                            | 52/63 (82.5)                                | 36/63 (57.1)                            |
| 100 to <130 mg/dL                                     | 10/63 (15.9)                                | 24/63 (38.1)                            |
| 130 to <160 mg/dL                                     | 0/63                                        | 3/63 (4.8)                              |
| 160 to <190 mg/dL                                     | 1/63 (1.6)                                  | 0/63                                    |
| ≥190 mg/dL                                            | 0/63                                        | 0/63                                    |
| 100 to <130 mg/dL                                     |                                             |                                         |
| <100 mg/dL                                            | 15/57 (26.3)                                | 10/68 (14.7)                            |
| 100 to <130 mg/dL                                     | 37/57 (64.9)                                | 28/68 (41.2)                            |
| 130 to <160 mg/dL                                     | 5/57 (8.8)                                  | 23/68 (33.8)                            |
| 160 to <190 mg/dL                                     | 0/57                                        | 7/68 (10.3)                             |
| ≥190 mg/dL                                            | 0/57                                        | 0/68                                    |
| 130 to <160 mg/dL                                     |                                             |                                         |
| <100 mg/dL                                            | 1/41 (2.4)                                  | 1/33 (3.0)                              |
| 100 to <130 mg/dL                                     | 13/41 (31.7)                                | 4/33 (12.1)                             |
| 130 to <160 mg/dL                                     | 22/41 (53.7)                                | 17/33 (51.5)                            |
| 160 to <190 mg/dL                                     | 5/41 (12.2)                                 | 10/33 (30.3)                            |
| ≥190 mg/dL                                            | 0/41                                        | 1/33 (3.0)                              |
| 160 to <190 mg/dL                                     |                                             |                                         |
| <100 mg/dL                                            | 0/11                                        | 1/15 (6.7)                              |
| 100 to <130 mg/dL                                     | 2/11 (18.2)                                 | 0/15                                    |
| 130 to <160 mg/dL                                     | 4/11 (36.4)                                 | 6/15 (40.0)                             |
| 160 to <190 mg/dL                                     | 3/11 (27.3)                                 | 3/15 (20.0)                             |
| ≥190 mg/dL                                            | 2/11 (18.2)                                 | 5/15 (33.3)                             |
| ≥190 mg/dL                                            |                                             |                                         |
| <100 mg/dL                                            | 0/8                                         | 0/4                                     |
| 100 to <130 mg/dL                                     | 0/8                                         | 0/4                                     |
| 130 to <160 mg/dL                                     | 1/8 (12.5)                                  | 2/4 (50.0)                              |
| 160 to <190 mg/dL                                     | 3/8 (37.5)                                  | 0/4                                     |
| ≥190 mg/dL                                            | 4/8 (50.0)                                  | 2/4 (50.0)                              |

---

\*The number (n) represents the subset of the total number of patients who met the criterion in question at least once during treatment. The denominator (/N1) for each parameter within a treatment group is the number of patients for the treatment group who had that parameter assessed postbaseline. The average of all postbaseline measurements for each patient is presented by baseline status.

AE, adverse event; LDL, low-density lipoprotein; q2w, every 2 weeks.
