# Supplementary material for: Efficacy and safety of sarilumab monotherapy versus adalimumab monotherapy for the treatment of patients with active rheumatoid arthritis (MONARCH): a randomised, double-blind, parallel-group phase III trial
Source: PubMed Central journal article supplement — Ann Rheum Dis. 2016 Nov 17;76(5):840–7. doi: 10.1136/annrheumdis-2016-210310 (PMC5530335; doi:10.1136/annrheumdis-2016-210310), 2016-11-17
Supplement: annrheumdis-2016-210310supp008.pdf [file annrheumdis-2016-210310supp008.pdf]

**Supplementary Table 7.** Overview of Incidence of Patients With a Positive ADA Assay Response (Immunogenicity Population)

|                                                      | <b>Sarilumab 200 mg q2w<br/>(n=184)</b> |
|------------------------------------------------------|-----------------------------------------|
| Peak titer                                           |                                         |
| Min:max                                              | 30.0:120.0                              |
| Patients with a persistent* positive response, n (%) | 5/184 (2.7)                             |
| Neutralizing†                                        | 0/184                                   |
| Non-neutralizing                                     | 5/184 (2.7)                             |
| Persistent based on last sample                      | 5/184 (2.7)                             |
| Patients with a transient‡ positive response, n (%)  | 8/184 (4.3)                             |
| Neutralizing†                                        | 0/184                                   |
| Non-neutralizing                                     | 8/184 (4.3)                             |

\*Persistent positive response: treatment-emergent positive ADA detected at 2 or more consecutive sampling time points during the AE period, where the first and last ADA-positive samples were separated by a period of at least 16 weeks. Also persistent in case last sample analyzed was positive.

†At least one postbaseline measurement classified as neutralizing positive.

‡Transient positive response is defined as any positive ADA assay response that is not considered persistent. ADA, antidrug antibody; AE, adverse event; q2w, every 2 weeks.
